# Supplementary material
Source: HighWire-hosted journal article supplement (https://www.cmaj.ca/content/suppl/2019/04/26/191.13.E350)
Supplement: april26_1.pdf [file april26_1.pdf]

## ÉDITORIAL

# NOUVELLE POLITIQUE DU CMAJ SUR LES CONFLITS D'INTÉRÊTS DANS LES LIGNES DIRECTRICES

Diane Kelsall MD MEd

Pour la version anglaise de l'article, veuillez consulter doi: 10.1503/cmaj.190316

Les lignes directrices sont de puissants outils. Elles ont le pouvoir de modifier les pratiques cliniques et les politiques de santé, ce qui se répercute sur la santé des patients, pour le meilleur et parfois pour le pire. Bien sûr, une mauvaise méthodologie peut donner à une ligne directrice une valeur clinique douteuse. Mais des biais peuvent se glisser dans la préparation de toutes lignes directrices, même si elles reposent sur une solide méthodologie. Il arrive que des conflits d'intérêts significatifs, de nature financière ou autre, affectent les recommandations finales d'une ligne directrice, ce qui peut conduire au surdiagnostic et au surtraitement et faire augmenter les coûts de la santé.<sup>1</sup> Pour s'attaquer au problème, le CMAJ adopte une nouvelle politique sur les conflits d'intérêts dans ses lignes directrices de pratique clinique.

En date de janvier 2020, le CMAJ appliquera les principes mis de l'avant par le GIN (Guidelines International Network) en matière de divulgation et de gestion des conflits d'intérêts dans les lignes directrices de pratique clinique.<sup>2</sup> Le but de cette nouvelle politique est de réduire le risque qu'au cours de leur conception, les recommandations des lignes directrices publiées dans le CMAJ se trouvent influencées par les intérêts concurrents des développeurs, des agences subventionnaires ou autres parties prenantes.

Nous sommes tous potentiellement en situation de conflit d'intérêts, financier ou autre, par notre situation personnelle, professionnelle, religieuse ou politique. Cela peut affecter notre travail,<sup>3</sup> et les lignes directrices y sont particulièrement vulnérables en raison de l'implication de multiples intervenants et des nombreux autres aspects de leur parfois long processus de rédaction. Dans le contexte des lignes directrices, un conflit d'intérêts significatif concerne tout ce qui pourrait influencer l'orientation ou la force d'une recommandation.<sup>2</sup>

Les 9 principes du document du GIN portent sur la divulgation et la gestion des conflits d'intérêts tout au long du processus de rédaction des lignes directrices.<sup>2</sup> Au cœur de ces principes se trouve la transparence, comme le stipule l'International Committee of Medical Journal Editors (ICMJE) dans la mise à jour de sa politique sur les conflits d'intérêts<sup>4</sup> récemment appliquée par le CMAJ.<sup>3</sup>

Mais dans ses directives, le GIN pousse plus loin sa démarche pour atténuer l'impact des conflits d'intérêts sur le processus de rédaction des lignes directrices : la définition de ce que constituent un conflit d'intérêts et sa gestion doit être fixée avant le recrutement des membres des comités de rédaction et elle doit s'appliquer à tous, indépendamment de la discipline ou des parties en présence.<sup>2</sup>

Dès le départ, les rédacteurs de lignes directrices doivent tout tenter pour exclure du comité de rédaction quiconque est susceptible de se trouver en situation de conflit d'intérêts significatif, financier ou autre. Toutefois, le GIN reconnaît que, pour certaines lignes directrices, cela pourrait être difficile à appliquer. Le cas échéant, il faut veiller à réduire les risques de biais. Les étapes en ce sens incluent : s'assurer que les participants en situation de conflit d'intérêts soient minoritaires au sein de ces comités et que les présidents (ou coprésidents) ne soient pas en situation de conflit d'intérêts significatif, financier ou autre. À noter, aucun membre d'un comité de rédaction responsable de l'orientation ou de la force d'une recommandation ne doit se trouver en situation de conflit d'intérêts financier; en outre, les membres en situation de conflit d'intérêts devraient s'exclure des discussions de cette nature.<sup>2</sup>

Parmi les membres des comités appelés à se prononcer, il devrait y avoir un équilibre approprié entre les opinions. Cela pourrait signifier que les experts qui se trouvent en situation de conflit d'intérêts peuvent à certains moments participer aux discussions sur un thème donné, sans être membres avec ou sans droit de vote, du comité de rédaction de la ligne directrice.<sup>2</sup>

Tout le contenu éditorial du CMAJ représente les opinions des auteurs de ce contenu, et ces opinions ne sont pas nécessairement celles de l'Association médicale canadienne et de ses filiales.

Pour assurer la transparence, le CMAJ exige actuellement que les comités de rédaction des lignes directrices dévoilent les situations de conflit d'intérêts individuels de leurs membres au moment du dépôt; ces conflits d'intérêts sont consignés sur le formulaire de déclaration du ICMJE<sup>4</sup> et inclus dans la ligne directrice publiée avec une description de la façon dont les conflits d'intérêts ont été gérés durant le processus de rédaction. L'avis du GIN va au-delà et recommande que les membres des comités de rédaction de lignes directrices en situation de conflit d'intérêts de nature financière déclarent les montants spécifiques reçus; le concepteur de la ligne directrice doit aussi énoncer clairement pourquoi il a été nécessaire d'inclure des membres qui se trouvent en situation de conflit d'intérêts lors de la rédaction de la ligne directrice.<sup>2</sup>

Il faut parfois des années pour rédiger une ligne directrice et, pendant ce temps, des situations de conflit d'intérêts qui n'étaient pas présentes au départ peuvent surgir. Tous les membres des comités de rédaction de lignes directrices doivent, à chaque réunion, divulguer toute modification de leur statut au chapitre des conflits d'intérêts, le cas échéant et, pour les comités permanents en particulier, ces révisions doivent être exigées à intervalles réguliers.<sup>2</sup>

Pour faciliter la gestion des conflits d'intérêts, le GIN recommande de créer un comité de supervision responsable de rédiger la définition et les règles qui s'appliquent aux conflits d'intérêts et de voir à leur respect. La portée du travail de ce comité devrait inclure le règlement des différends et le soutien au président du comité de rédaction pour déterminer qui seront les membres avec et sans droit de vote et qui pourra participer aux discussions à titre d'expert.<sup>2</sup>

Le CMAJ souhaite publier des lignes directrices de grande qualité afin d'améliorer la santé des patients. Au moment de choisir des

lignes directrices, nous exigeons une méthodologie solide reposant sur un système robuste d'évaluation des données probantes à l'aide d'un outil comme GRADE (*Grading of Recommendations Assessment, Development and Evaluation*; [www.gradeworkinggroup.org](http://www.gradeworkinggroup.org)), qui cadre avec les pratiques exemplaires (entre autres, celles de la version à jour de l'instrument AGREE II [*Appraisal of Guidelines for Research and Evaluation instrument*; [www.agreertrust.org](http://www.agreertrust.org)]) et, en date de 2020, qui est conforme aux principes du GIN<sup>2</sup> pour la déclaration et la gestion des conflits d'intérêts.

Rédiger une ligne directrice est un travail exigeant et les experts qui sont mis à contribution y consacrent beaucoup de temps. Une gestion appropriée des conflits d'intérêts pendant la rédaction de la ligne directrice fera en sorte que cet effort ne soit pas vain.

## Références

1. Jatoi I, Sah S. Clinical practice guidelines and the overuse of health care services: need for reform. *CMAJ* 2019;191:E297-8.
2. Schünemann HJ, Al-Ansary LA, Forland F, et al. Board of Trustees of the Guidelines International Network. Guidelines International Network: principles for disclosure of interests and management of conflicts in guidelines. *Ann Intern Med* 2015;163:548-53.
3. Kelsall D. Updated CMAJ policy on undisclosed competing interests. *CMAJ* 2019;191:E116-7.
4. *Recommandations pour la conduite, la présentation, la rédaction et la publication des travaux de recherche soumis à des revues médicales*. International Committee of Medical Journal Editors; mise à jour décembre 2018. Accessible : [www.icmje.org/icmje-recommendations.pdf](http://www.icmje.org/icmje-recommendations.pdf) (consulté le 18 mars 2019).

**Intérêts concurrents** : Se rendre à [www.cmaj.ca/site/misc/cmaj\\_staff.xhtml](http://www.cmaj.ca/site/misc/cmaj_staff.xhtml)

**Affiliation** : Rédactrice en chef [intérimaire] du CMAJ

**Correspondance à** : Éditeur du CMAJ, [cmaj@cmajgroup.ca](mailto:cmaj@cmajgroup.ca)

## RÉSUMÉ DE RECHERCHE ■ SANTÉ MENTALE

# Inégalités socioéconomiques, détresse psychologique et comportements suicidaires chez les populations autochtones vivant hors réserve au Canada

Mohammad Hajizadeh PhD, Amy Bombay PhD, Yukiko Asada PhD

Pour la version anglaise de l'article, veuillez consulter doi: 10.1503/cmaj.181374

Infographie accessible à [www.cmaj.ca/lookup/suppl/doi:10.1503/cmaj.181374/-/DC2](http://www.cmaj.ca/lookup/suppl/doi:10.1503/cmaj.181374/-/DC2)

**CONTEXTE** : Les populations autochtones du Canada présentent des taux élevés de détresse psychologique et de suicide. Nous avons voulu évaluer les inégalités socioéconomiques liées à la détresse psychologique et aux comportements suicidaires, ainsi que les facteurs pouvant les expliquer chez les populations autochtones vivant hors réserve.

**MÉTHODES** : À partir de l'Enquête auprès des peuples autochtones de 2012, un sondage nationalement représentatif mené auprès d'adultes autochtones vivant hors réserve au Canada, nous avons mesuré les inégalités économiques liées à la détresse psychologique (mesurée au moyen de l'échelle de détresse psychologique en 10 points de Kessler) et aux comportements suicidaires (idées
